# Supplementary material
Source: PubMed Central journal article supplement (PMC5588811)
Supplement: IMM-152-276-s001.pdf [file IMM-152-276-s001.pdf]

| Antibody target/Reagent              | Clone/Cat. No.                          | Dilution | Provider          |
|--------------------------------------|-----------------------------------------|----------|-------------------|
| CD19                                 | 6D5                                     | 1:100    | Biologend         |
| FAS (CD95)                           | JO2                                     | 1:100    | BD Biosciences    |
| CD45.1                               | A20                                     | 1:100    | Biologend         |
| CD45.2                               | 104                                     | 1:100    | Biologend         |
| Bcl-6                                | K112-91                                 | 1:20     | BD Biosciences    |
| PNA                                  | FL-1071                                 | 1:500    | Vector Labs       |
| CD138                                | 281-2                                   | 1:100    | BD Biosciences    |
| Annexin V Kit                        | 88-8102                                 | 1:50     | eBioscience       |
| B220                                 | RA3-6B2                                 | 1:100    | eBioscience       |
| Streptavidin                         | 25-4317-82                              | 1:500    | eBioscience       |
| Live/Dead Kit                        | L10119                                  | 1:100    | Life Technologies |
| Ki-67 Kit                            | B56                                     | 1:2      | BD Biosciences    |
| Fc-blocker                           | 2.4G2                                   | 1:100    | BD Biosciences    |
| CD98                                 | RL388                                   | 1:100    | eBioscience       |
| Mouse IgG                            | Poly4053                                | 1:500    | Biologend         |
| Mouse IgM                            | II/41                                   | 1:200    | BD Biosciences    |
| 4-Hydroxy-3-nitrophenylacetyl hapten | conjugated to PE<br>(Cat. No. N-5070-1) | 1:100    | Bioresearch       |
| Ig lambda light chain                | R26-46                                  | 1:100    | BD Biosciences    |
